# Supplementary material for: Nitrogen Fertilization Effects on Productivity and Nitrogen Loss in Three Grass-Based Perennial Bioenergy Cropping Systems
Source: PubMed Central journal article supplement (PMC4798553; doi:10.1371/journal.pone.0151919), 2016-03-18
Supplement: pone.0151919.s001.pdf [file pone.0151919.s001.pdf]

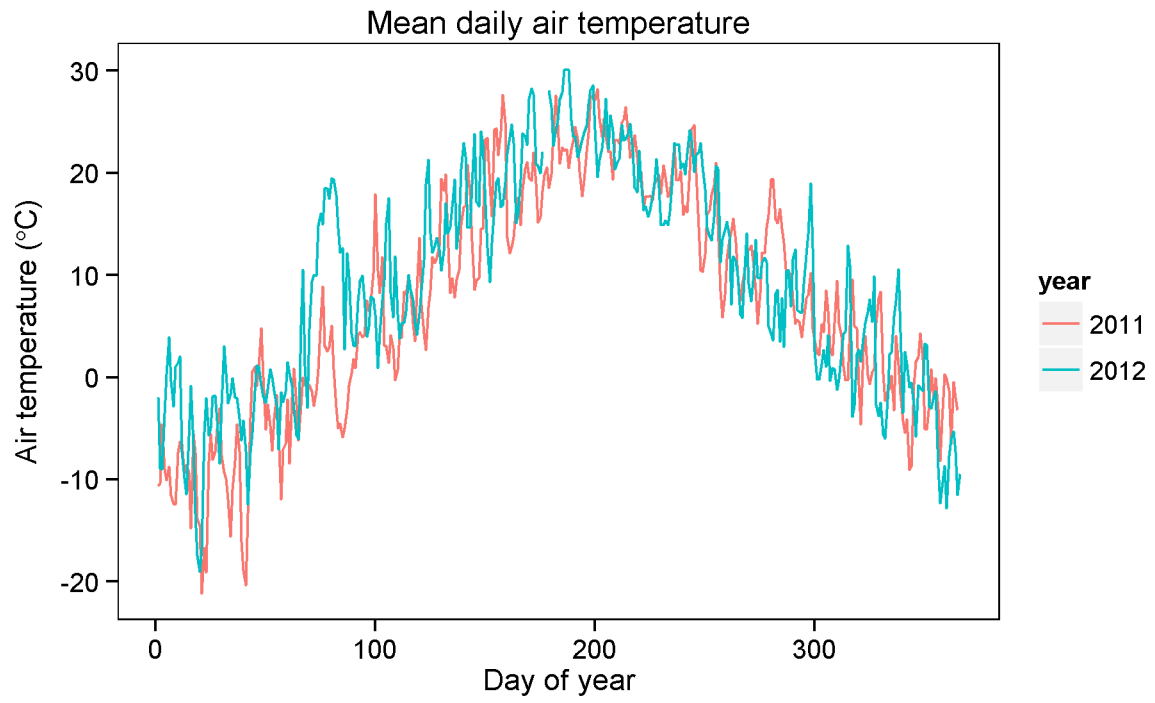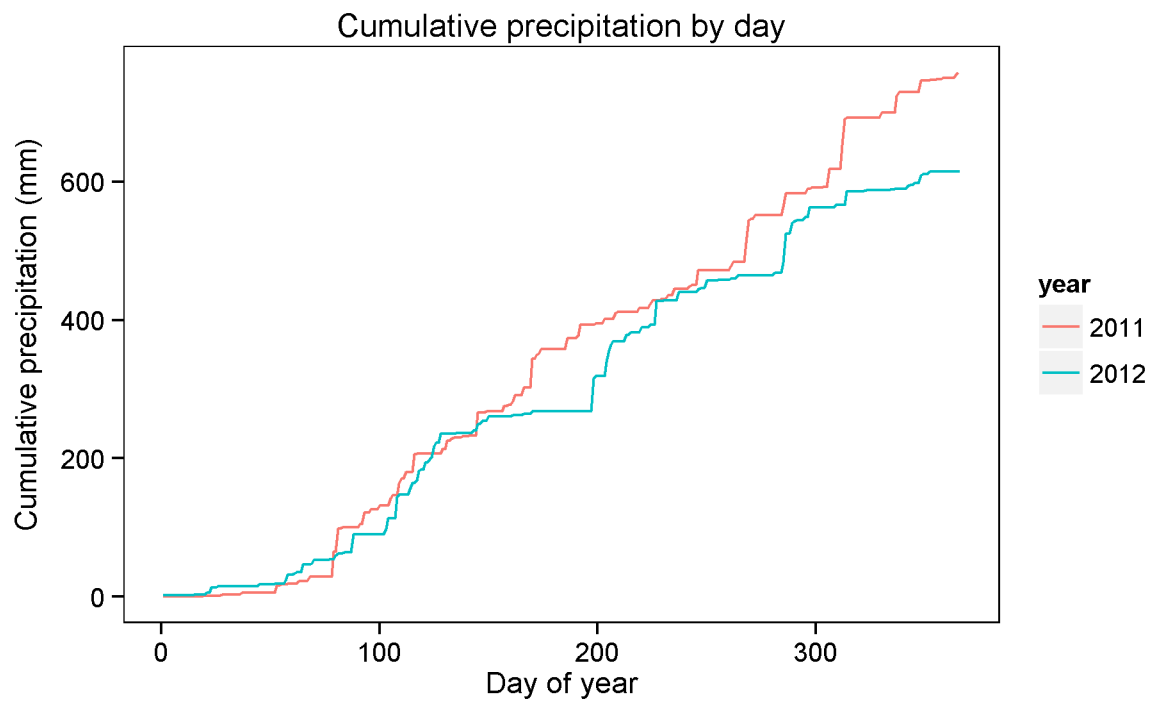

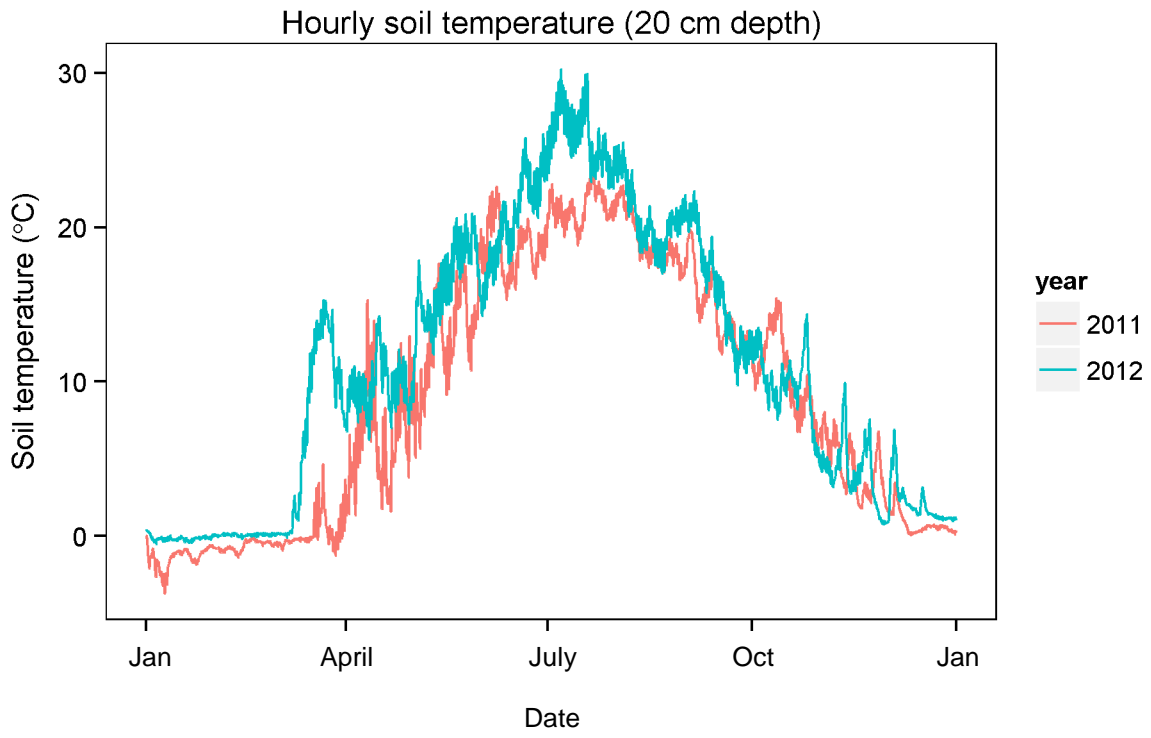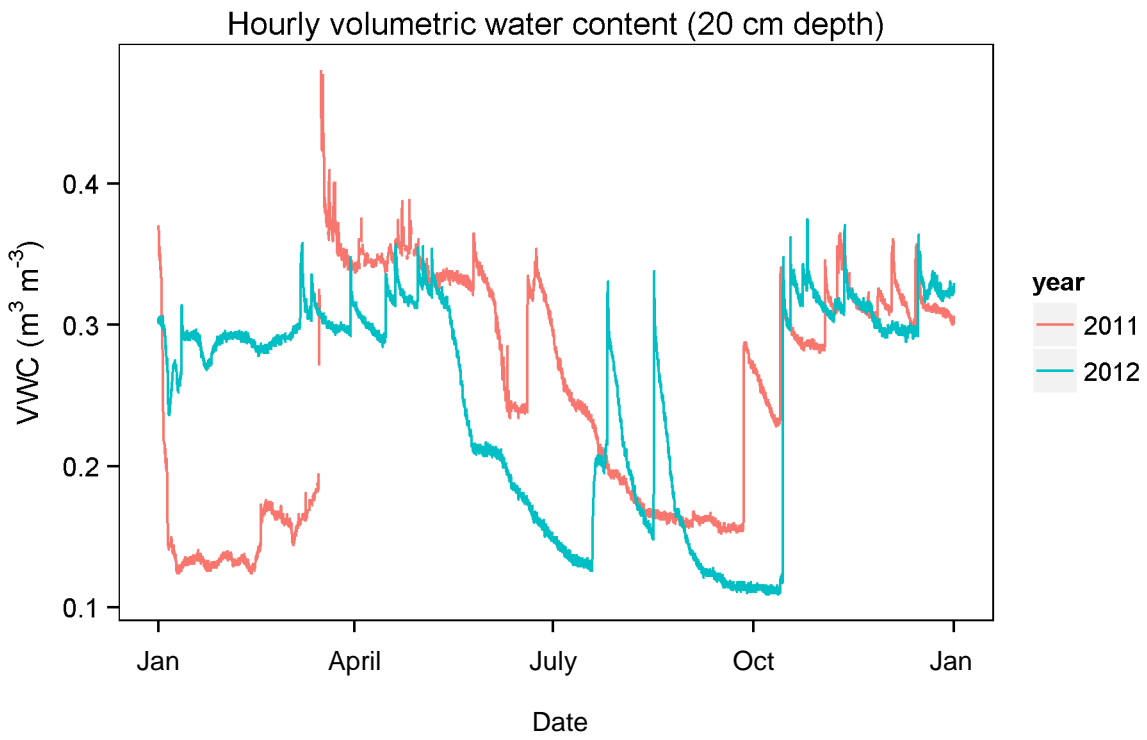

**S1 Figure.** High-frequency soil and climate measurements collected from a single switchgrass plot in the Bioenergy Cropping Systems Experiment at Arlington Agricultural Research Station.
