# Supplementary material for: Nitrogen Fertilization Effects on Productivity and Nitrogen Loss in Three Grass-Based Perennial Bioenergy Cropping Systems
Source: PubMed Central journal article supplement (PMC4798553; doi:10.1371/journal.pone.0151919), 2016-03-18

# BCSE plot dimensions and sample design

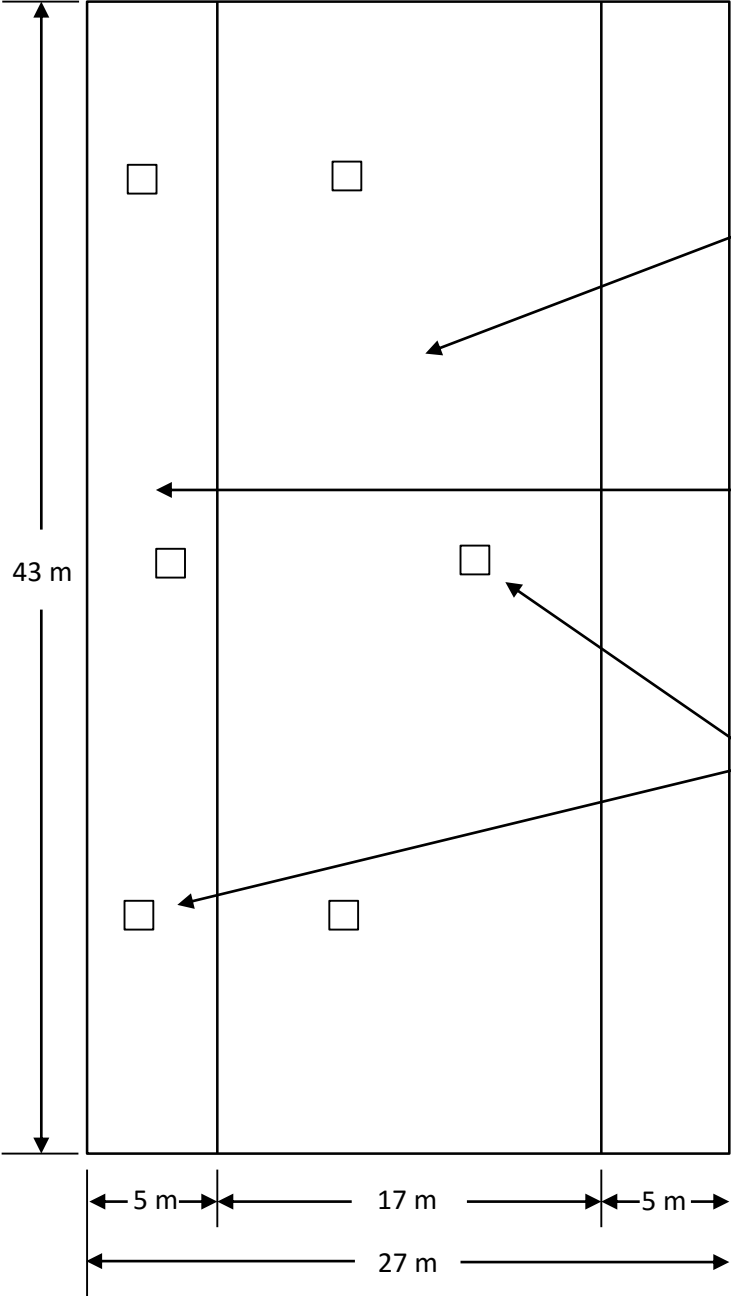

Main plot:  
N+ switchgrass and native grasses  
N- restored prairie

Subplot:  
N- switchgrass and native grasses  
N+ restored prairie

Randomly placed sample quadrats

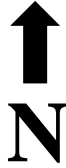

Supplement: pone.0151919.s002.pdf [file pone.0151919.s002.pdf]
