# Supplementary material for: Nitrogen Fertilization Effects on Productivity and Nitrogen Loss in Three Grass-Based Perennial Bioenergy Cropping Systems
Source: PubMed Central journal article supplement (PMC4798553; doi:10.1371/journal.pone.0151919), 2016-03-18
Supplement: pone.0151919.s003.pdf [file pone.0151919.s003.pdf]

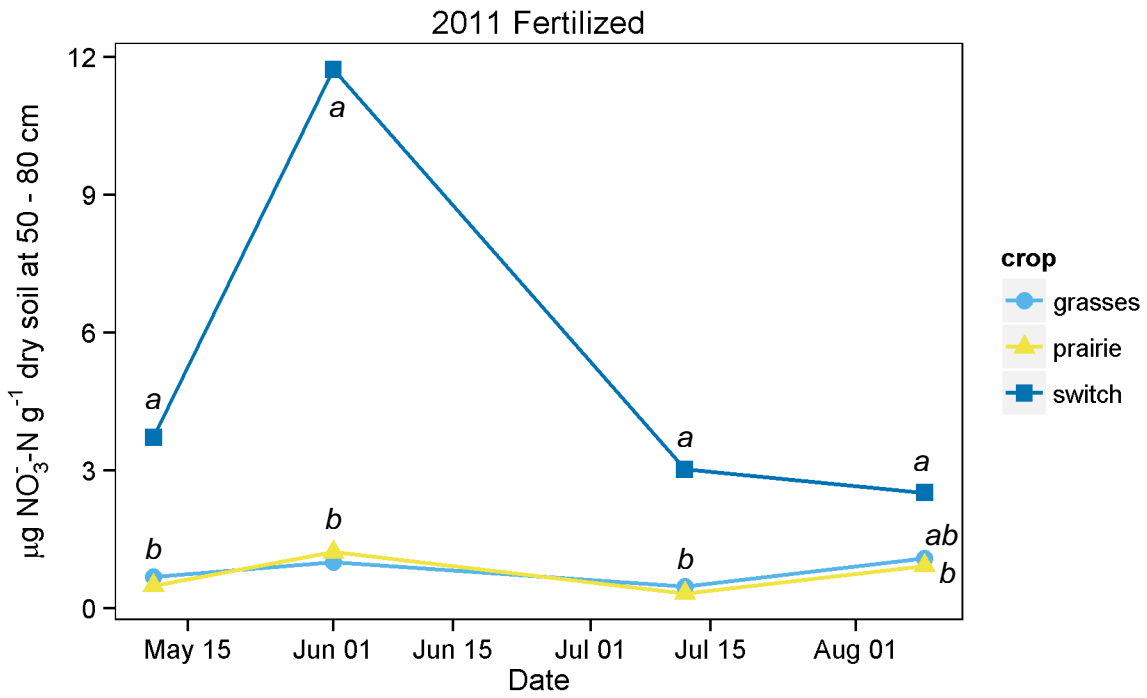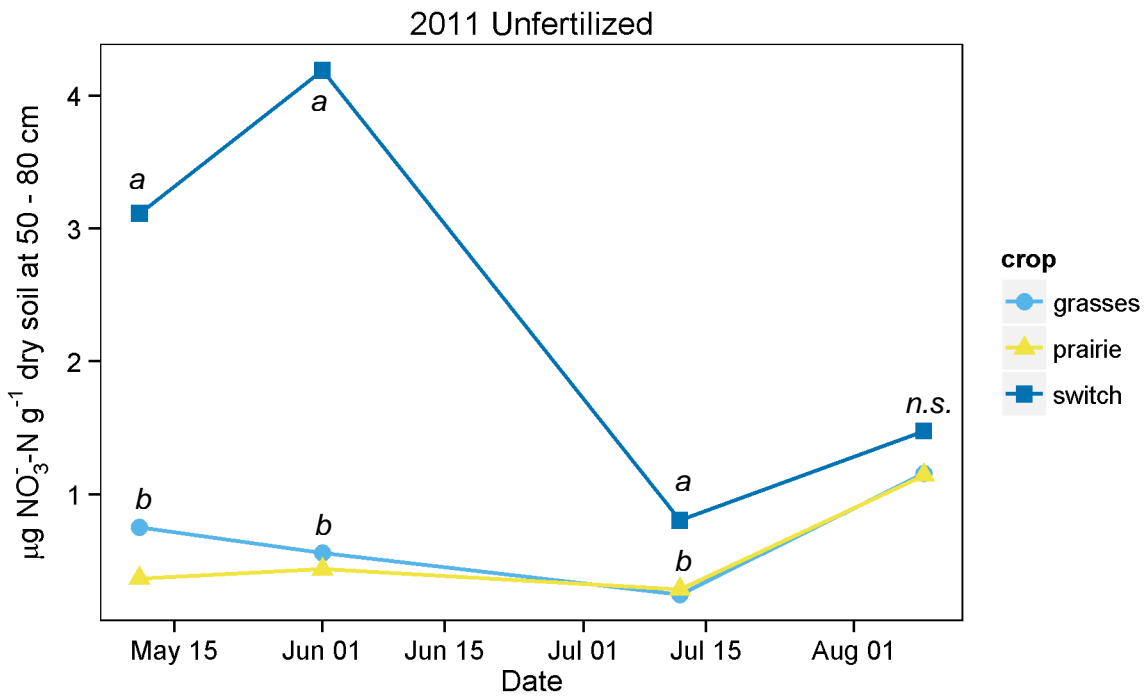

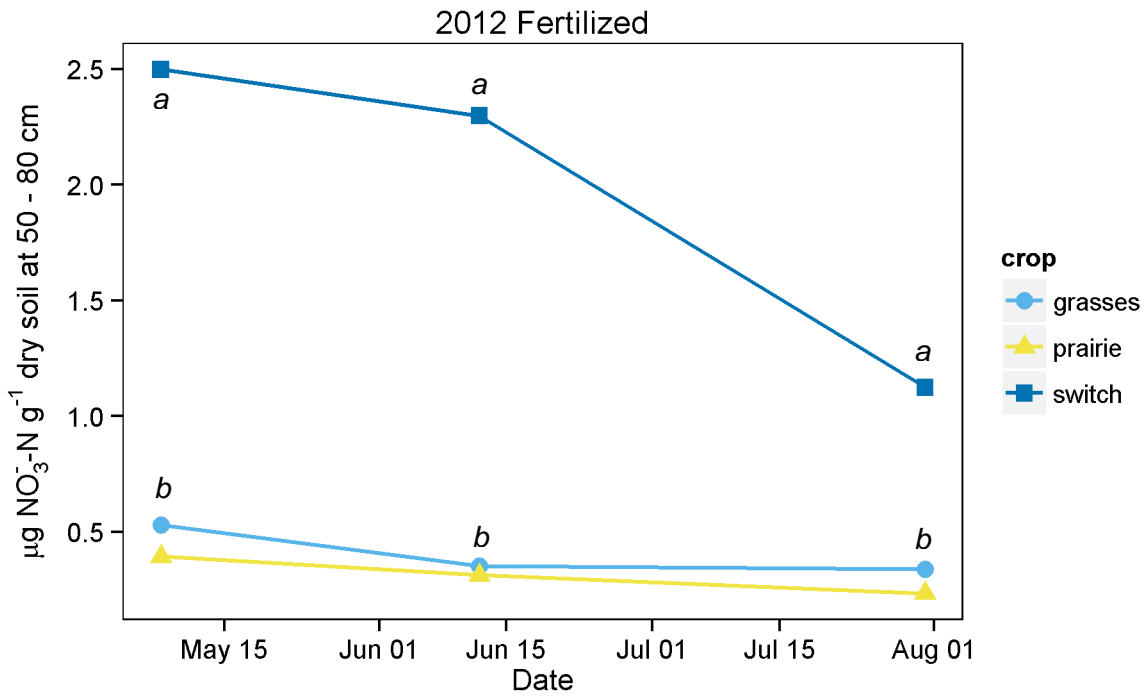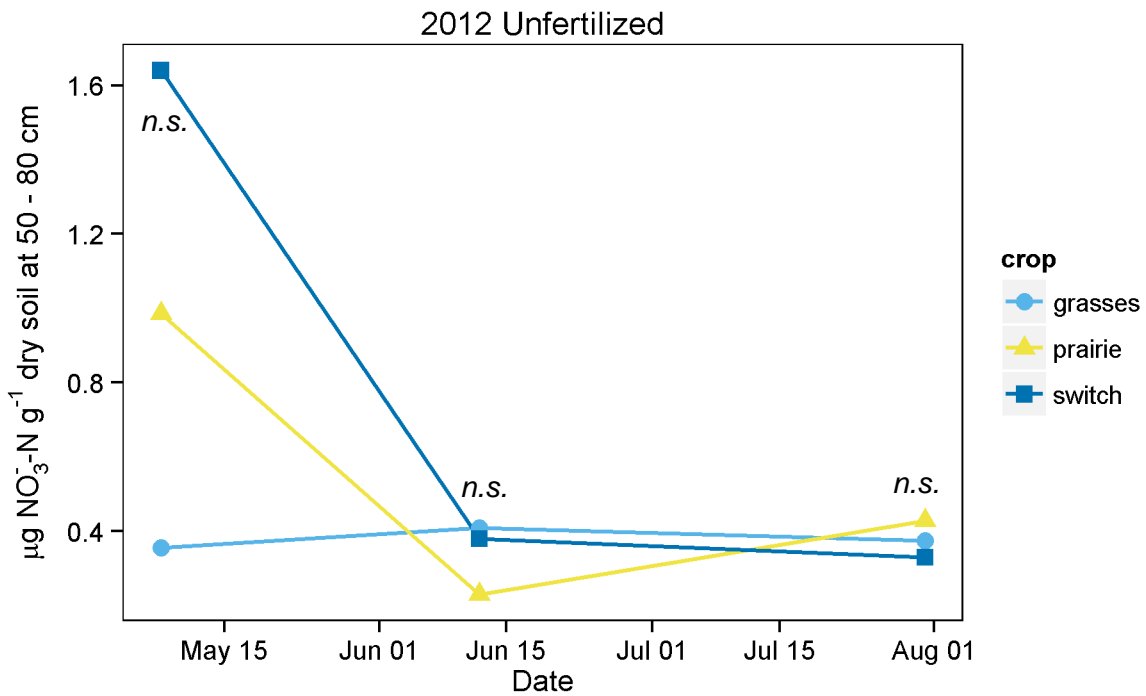

**S2 Figure.** Growing season soil nitrate concentrations. Plotted values are treatment means.

Letters indicate groups not significantly different ( $P > 0.05$  after Tukey correction), n.s. indicates no significant differences among crops on a date.
