# Supplementary material for: Nitrogen Fertilization Effects on Productivity and Nitrogen Loss in Three Grass-Based Perennial Bioenergy Cropping Systems
Source: PLOS journal article supplement (doi:10.1371/journal.pone.0151919), 2016-03-18
Supplement: S4 (10.1371/journal.pone.0151919.s004) [file journal.pone.0151919.s004]

**S1 Table.** Mean growing season soil temperature and water filled pore space (WFPS) to 10 cm by cropping system, year, and fertilization.

| Cropping system                                                                                | Year | Fertilization | Soil temp. (°C) | Water-filled pore space (%) |
|------------------------------------------------------------------------------------------------|------|---------------|-----------------|-----------------------------|
| Switchgrass                                                                                    | 2011 | Fertilized    | 19.3 ± 0.2      | 40.5 ± 1.3                  |
|                                                                                                |      | Unfertilized  | 19.4 ± 0.2      | 41.1 ± 1.3                  |
|                                                                                                | 2012 | Fertilized    | 20.9 ± 0.2      | 34.8 ± 1.0                  |
|                                                                                                |      | Unfertilized  | 20.8 ± 0.2      | 36.2 ± 1.0                  |
| Native grasses                                                                                 | 2011 | Fertilized    | 19.3 ± 0.2      | 35.5 ± 1.3                  |
|                                                                                                |      | Unfertilized  | 19.7 ± 0.2      | 36.3 ± 1.3                  |
|                                                                                                | 2012 | Fertilized    | 20.8 ± 0.2      | 32.5 ± 1.0                  |
|                                                                                                |      | Unfertilized  | 21.2 ± 0.2      | 35.0 ± 1.0                  |
| Restored prairie                                                                               | 2011 | Fertilized    | 19.3 ± 0.2      | 38.2 ± 1.3                  |
|                                                                                                |      | Unfertilized  | 20.1 ± 0.2      | 39.8 ± 1.3                  |
|                                                                                                | 2012 | Fertilized    | 20.8 ± 0.2      | 34.9 ± 1.0                  |
|                                                                                                |      | Unfertilized  | 21.3 ± 0.2      | 36.9 ± 1.0                  |
| Values are means (± s.e.) over all measurements taken during the May-September growing season. |      |               |                 |                             |
